# Supplementary material
Source: publisher figshare collection journal article supplement (https://acs.figshare.com/ndownloader/files/28224791)
Supplement: Supplementary file 1 [file 28224791]

# Supporting Information

## **Fly ash carbon anodes for alkali metal-ion batteries**

*Jian Yin,<sup>†</sup> Wenli Zhang,<sup>§</sup> Gang Huang,<sup>†</sup> Nuha A. Alhebshi,<sup>∥</sup> Numan Salah,<sup>‡</sup> Mohamed Nejib Hedhili,<sup>⊥</sup> and Husam N. Alshareef<sup>\*†</sup>*

<sup>†</sup> Materials Science and Engineering, Physical Science and Engineering Division, King Abdullah University of Science and Technology (KAUST), Thuwal 23955–6900, Saudi Arabia

<sup>§</sup> School of Chemical Engineering and Light Industry, Guangdong University of Technology (GDUT), Guangzhou 510006, China

<sup>∥</sup> Physics Department, Faculty of Science, King Abdulaziz University, Jeddah 21589, Saudi Arabia

<sup>‡</sup> Center of Nanotechnology, King Abdulaziz University, Jeddah 21589, Saudi Arabia

<sup>⊥</sup> Imaging and Characterization Core Lab, King Abdullah University of Science and Technology, Thuwal 23955–6900, Saudi Arabia

\* Corresponding author: husam.alshareef@kaust.edu.sa (H. N. A.)

## **List of Contents**

1. Supplementary Figures

2. Supplementary Tables

## 1. Supplementary Figures

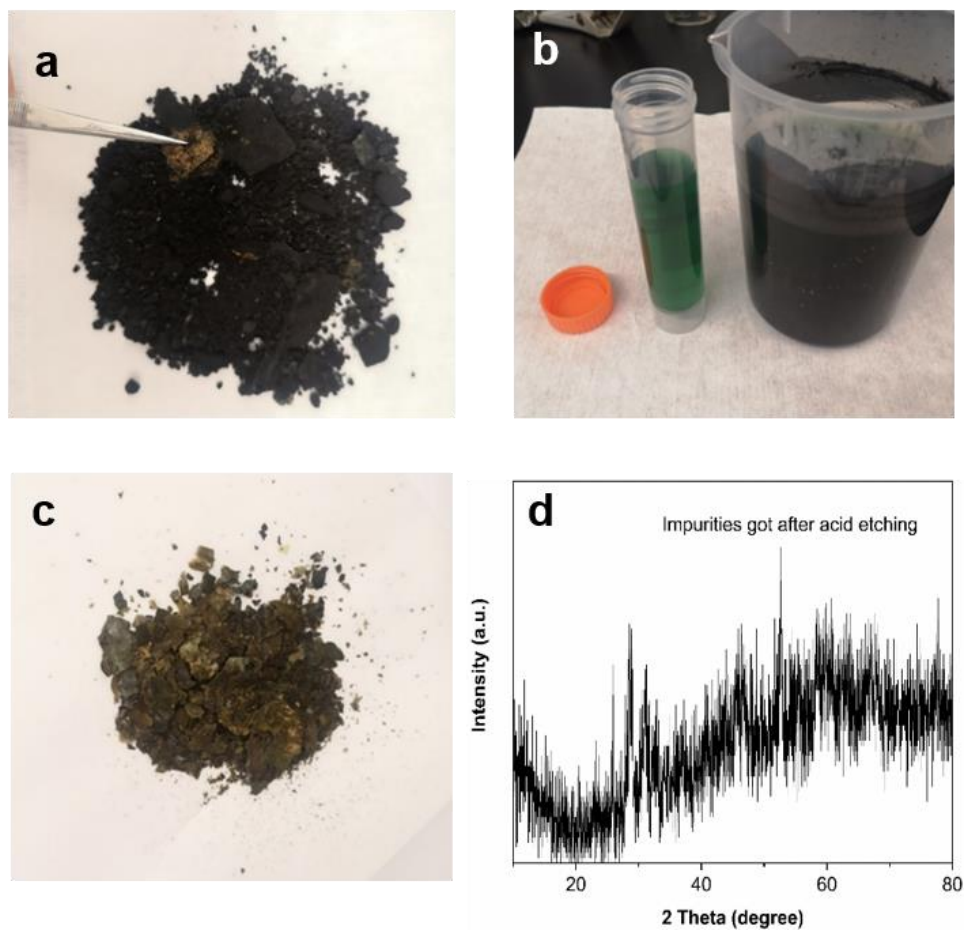

**Figure S1.** Optical photograph of (a) fly ash, (b) filter liquor after fly ash soaked in the 1 mol L<sup>-1</sup> HCl, and (c) impurities from the dried filter liquor. (d) XRD pattern of the impurities.

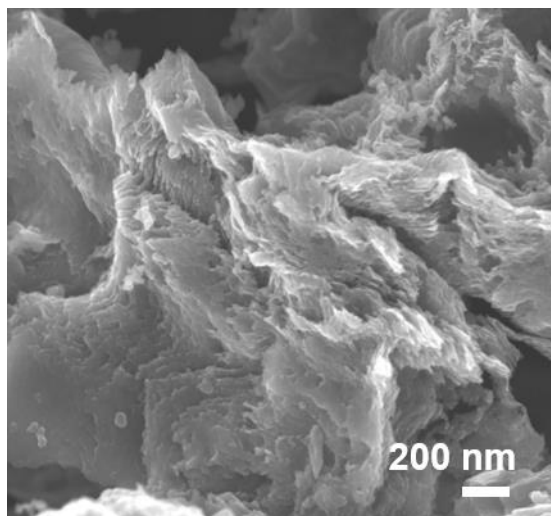

**Figure S2.** SEM image of FACT.

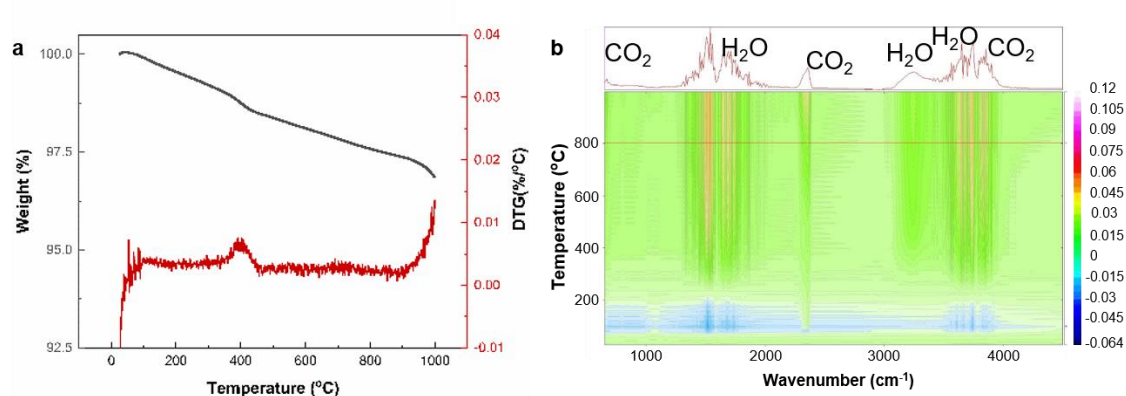

**Figure S3.** (a) TGA, DTG curves of FAC in the argon atmosphere, and corresponding (b) FTIR spectra of the gas produced in the thermal treatment of FAC.

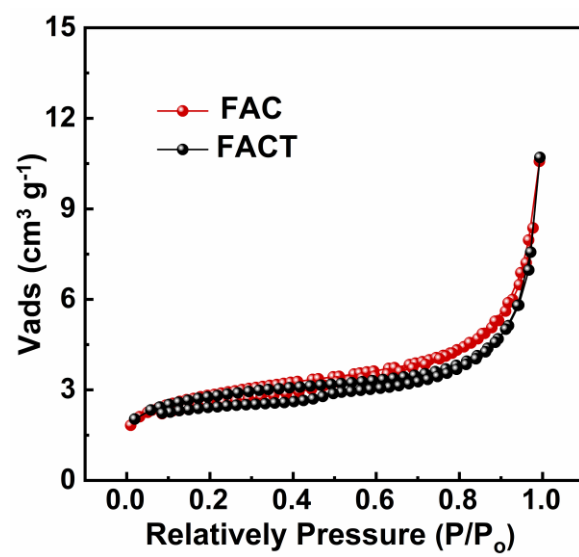

**Figure S4.** N<sub>2</sub> adsorption and desorption isotherms of FAC and FACT.

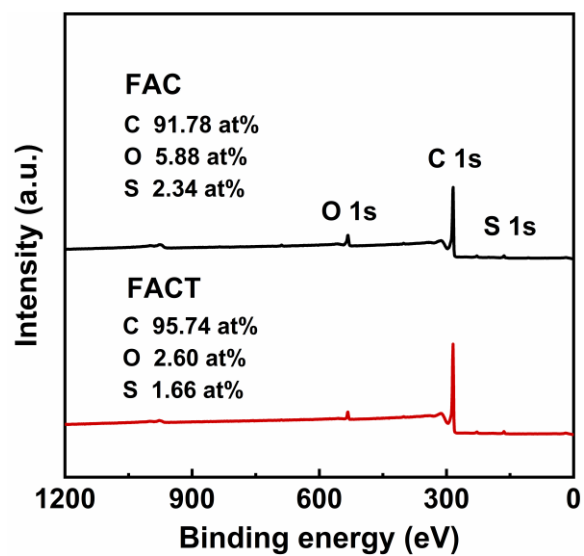

**Figure S5.** XPS survey of FAC and FACT.

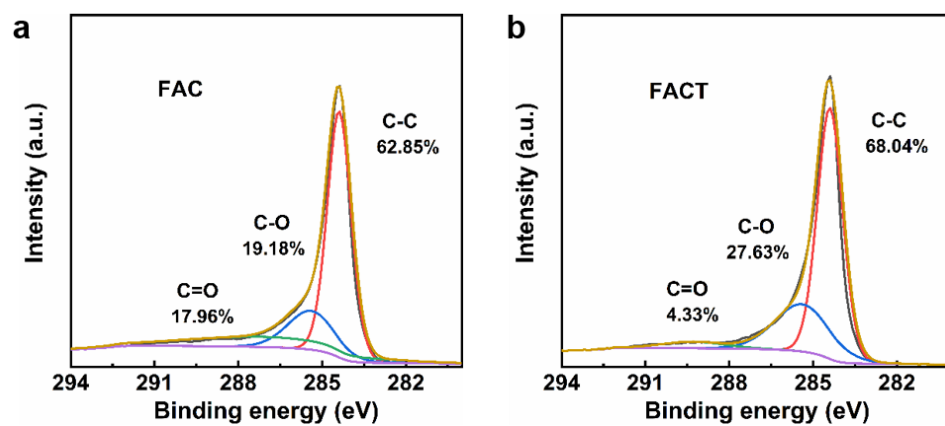

**Figure S6.** High-resolution C 1s XPS spectra of (a) FAC and (b) FACT.

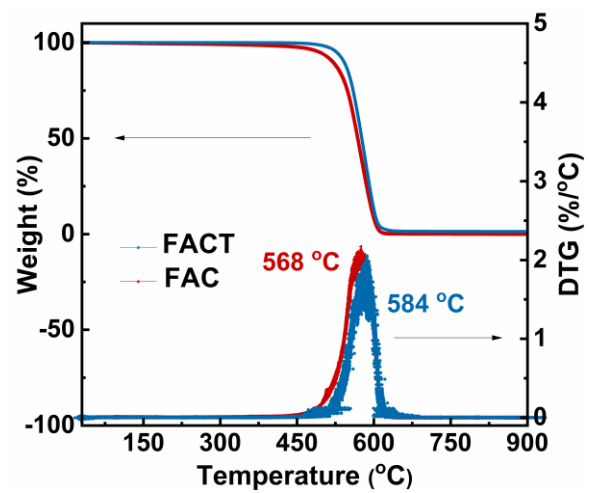

**Figure S7.** TGA and DTG curves of FAC and FACT in the air atmosphere.



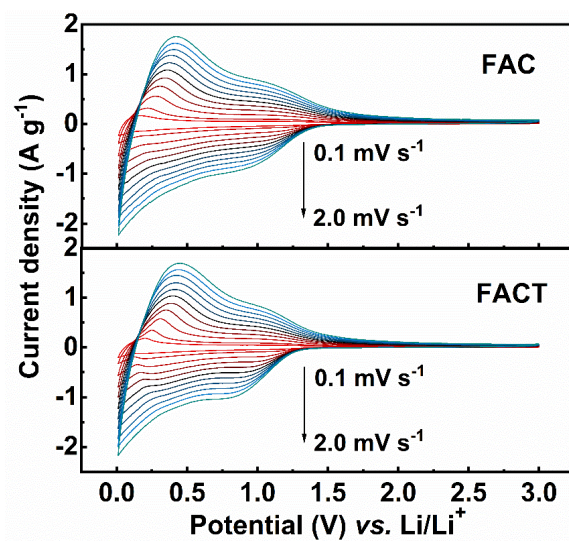

**Figure S8.** CV at various scan rates from 0.1 to 2.0  $\text{mV s}^{-1}$  of FAC and FACT anodes in lithium-ion half cells.

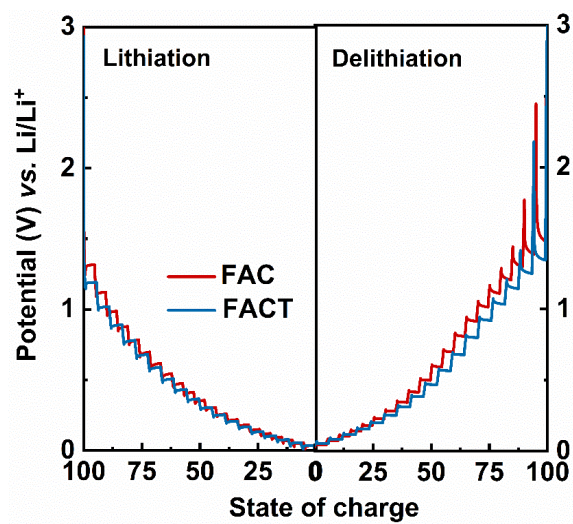

**Figure S9.** GITT profiles of FAC and FACT anodes in lithium-ion half cells tested at a current density of 50 mA g<sup>-1</sup>.

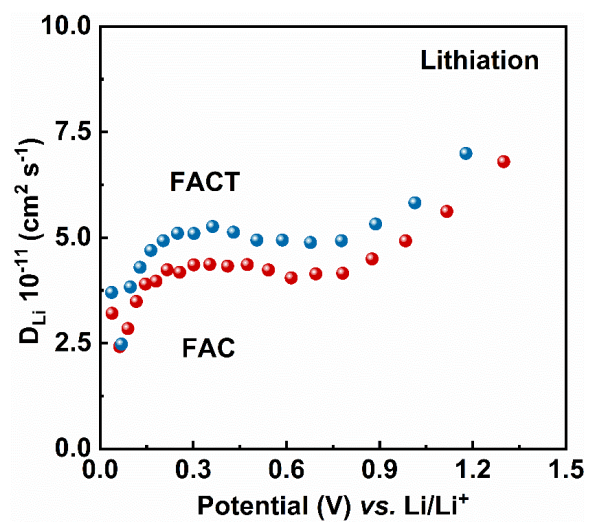

**Figure S10.** Diffusion coefficient of Li<sup>+</sup> ions in the FAC and FACT anodes during the discharge process.

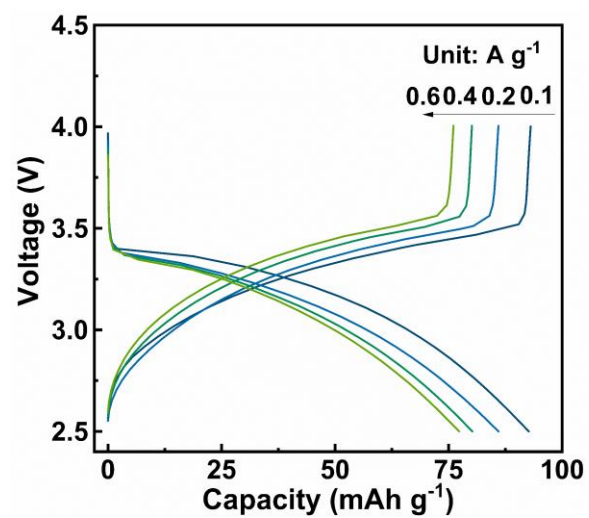

**Figure S11.** GCD curves of FAC//LiFePO<sub>4</sub> full cell under different current densities.

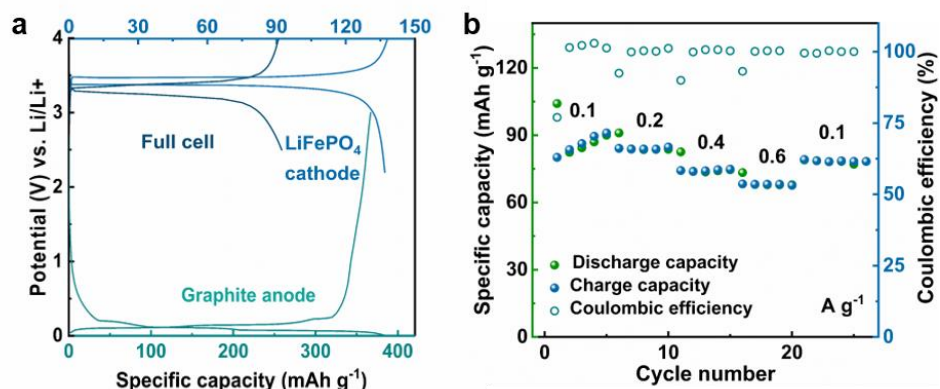

**Figure S12.** (a) GCD curves of LiFePO<sub>4</sub> cathode, graphite anode, and graphite//LiFePO<sub>4</sub> full cell. (b) The rate capability of graphite//LiFePO<sub>4</sub> full cell.

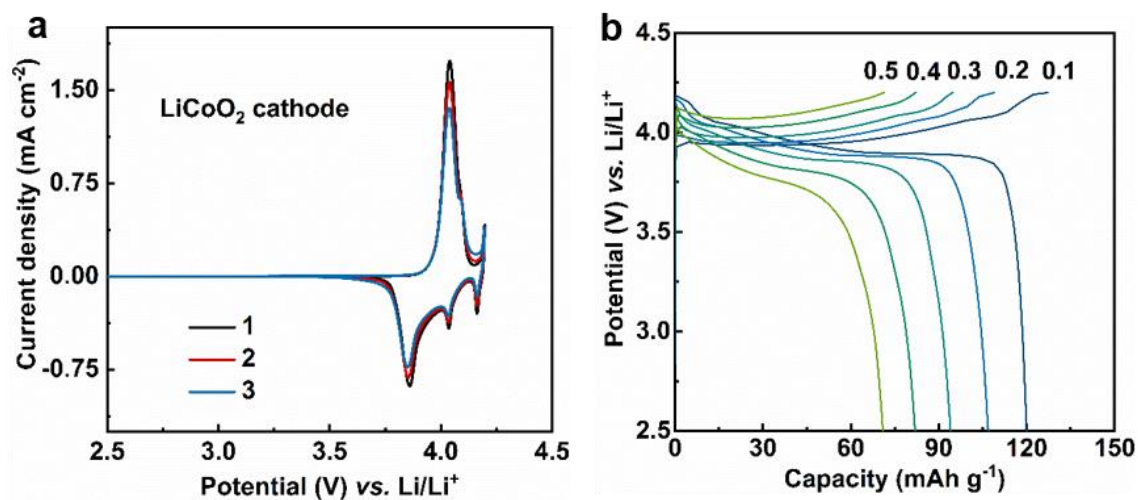

**Figure S13.** (a) CV curves and (b) GCD curves of  $\text{LiCoO}_2$  cathode.

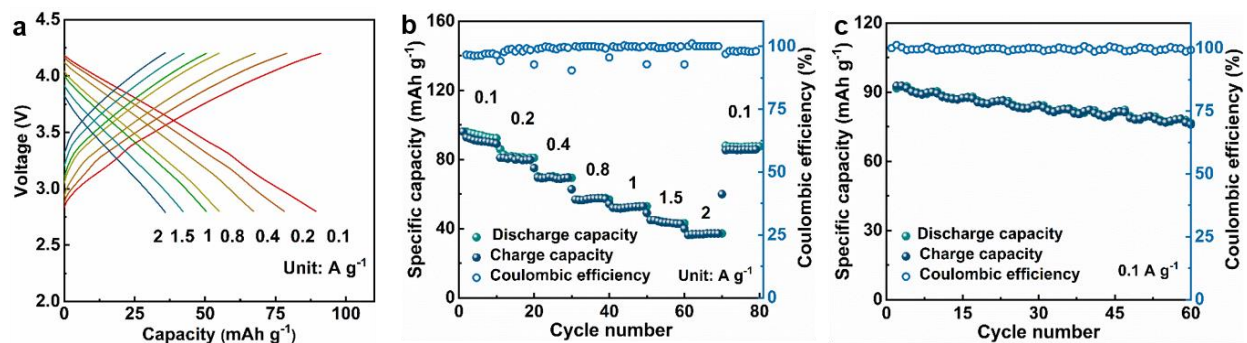

**Figure S14.** (a) GCD curves FAC//LiCoO<sub>2</sub> full cell. (b) Rate capability of FAC//LiCoO<sub>2</sub> full cell. (c) Cycling performance of the FAC//LiCoO<sub>2</sub> full cell of 0.1 A g<sup>-1</sup> (Capacity is calculated with the total weight of cathode and anode).

## 2. Supplementary Tables

**Table S1** Elemental contents of FAC and FACT tested by ICP.

| Element | FAC             | FACT            |
|---------|-----------------|-----------------|
|         | Mass percentage | Mass percentage |
|         | wt. %           | wt. %           |
| V       | 0.122           | 0.135           |
| Na      | 0.017           | 0.018           |
| Al      | 0.060           | 0.066           |
| Fe      | 0.047           | 0.051           |
| Si      | 0.177           | 0.196           |



**Table S2** Atomic fraction of FAC anode with different etching time.

| Elemental fraction (at%) |              | Li    | C     | O     | P    | F     |
|--------------------------|--------------|-------|-------|-------|------|-------|
| Charge state             | Etching time |       |       |       |      |       |
| 3 V                      | 0            | 34.82 | 30.39 | 21.42 | 0.78 | 10.59 |
|                          | 10 min       | 33.59 | 33.90 | 21.24 | 0.47 | 10.80 |
|                          | 20 min       | 34.95 | 34.12 | 19.22 | 0.45 | 11.26 |
|                          | 30 min       | 31.98 | 37.14 | 18.40 | -    | 12.47 |
| 0.01 V                   | 0            | 43.20 | 22.88 | 27.35 | 0.37 | 6.19  |
|                          | 10 min       | 42.23 | 27.78 | 27.55 | 0.45 | 6.00  |
|                          | 20 min       | 46.22 | 22.27 | 25.40 | 0.31 | 5.80  |
|                          | 30 min       | 47.96 | 21.76 | 23.98 | 0.45 | 5.85  |
